# Supplementary material for: Light-Induced Antioxidant Phenolic Changes among the Sprouts of Lentil Cultivar
Source: MDPI journal article supplement (doi:10.3390/antiox13040399), 2024-03-27
Supplement: s1 [file s1]

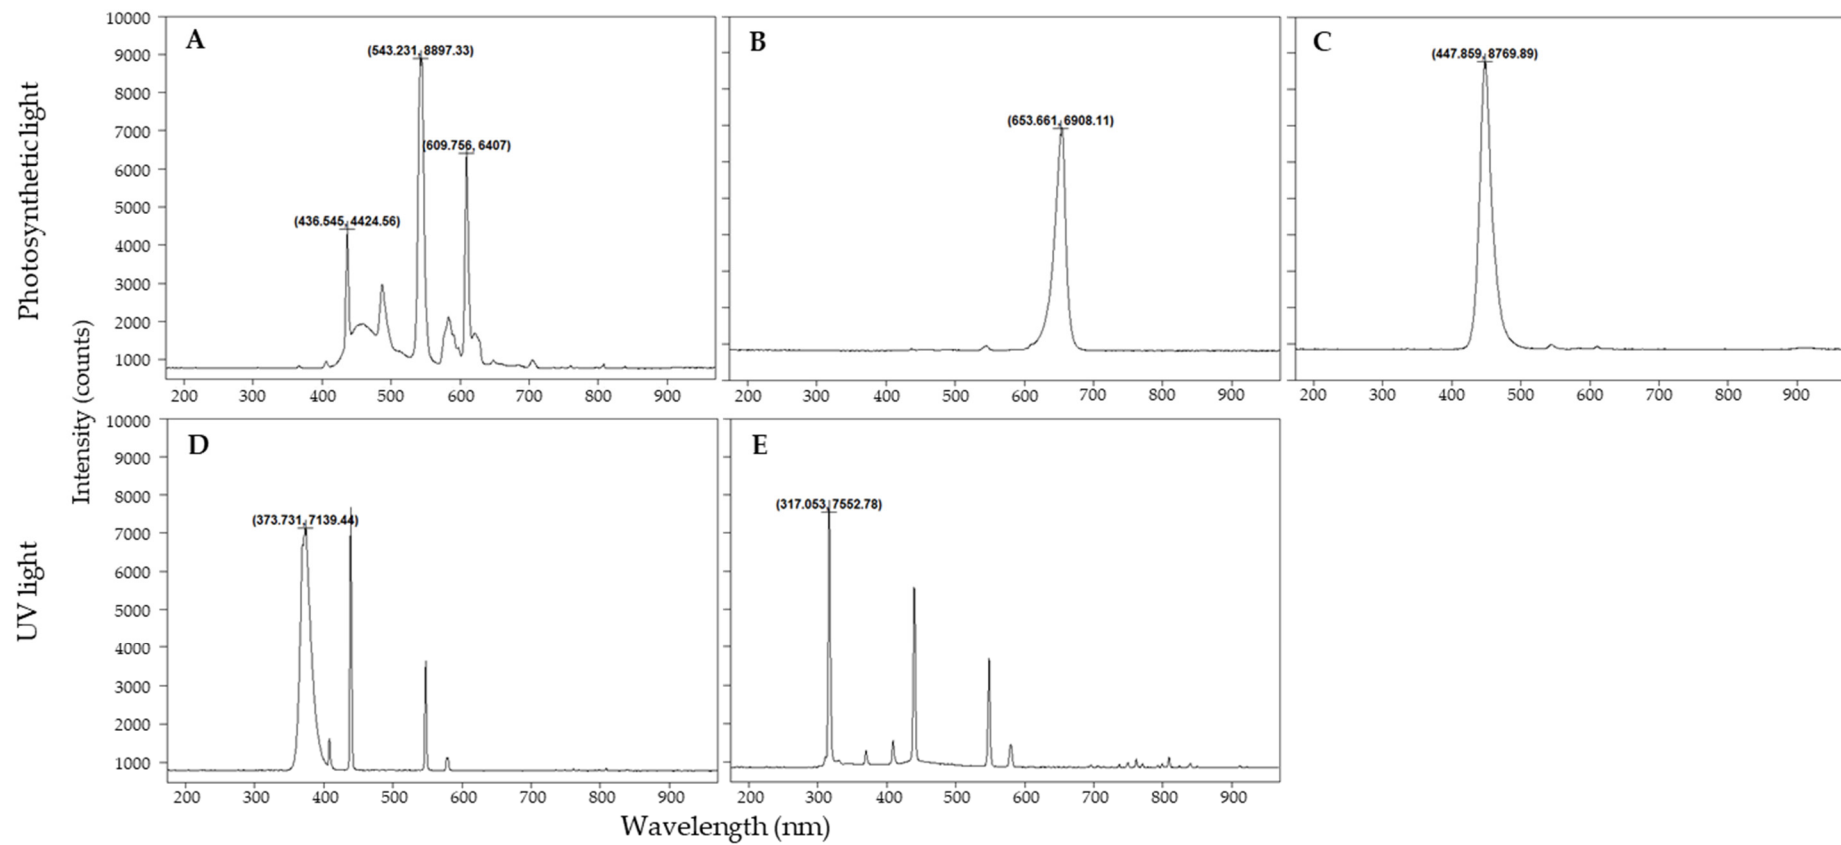

**Supplementary Figure S1.** Light spectrum of the light sources, fluorescent light (A), red LED (B), blue LED (C), ultraviolet-A (D), and ultraviolet-B (E), used in this study.
